# Supplementary material for: Combining crossed-lamellar structure and nacre-like nanoparticulate structure in conch shells for enhanced mechanical properties
Source: Royal Society of Chemistry journal article supplement (doi:10.1039/d5ce00162e), 2025-01-01
Supplement: d5ce00162e3.pdf [file d5ce00162e3.pdf]

## Supporting Information

### Combining crossed-lamellar structure and nacre-like nanoparticulate structure in conch shells for enhanced mechanical properties

Mingshu Jin<sup>a,b,#</sup>, Ping Yuan<sup>c,#</sup>, Luyao Yi<sup>b\*</sup>, Zhuanfei Liu<sup>b</sup>, Zhengyi Fu<sup>b</sup> and Zhaoyong Zou<sup>a,b\*</sup>

<sup>a</sup>Hubei Longzhong Laboratory, Wuhan University of Technology Xiangyang Demonstration Zone, Xiangyang 441000, China;

<sup>b</sup>State Key Laboratory of Advanced Technology for Materials Synthesis and Processing, Wuhan University of Technology, Wuhan 430070, China;

<sup>c</sup>School of Materials Science and Engineering, Wuhan University of Technology, Wuhan 430070, China;

<sup>#</sup>These authors contributed equally to this work.

<sup>\*</sup>Corresponding authors.

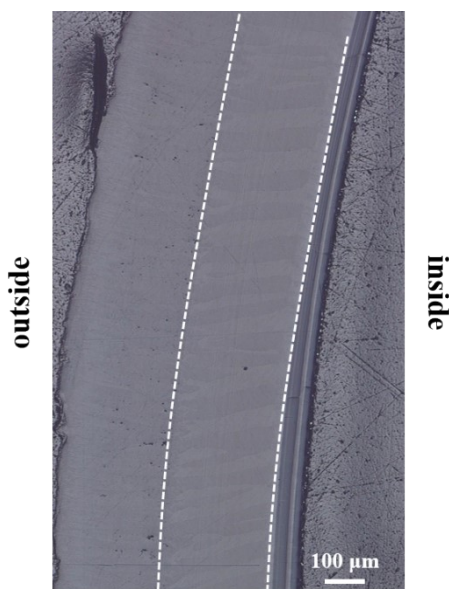

**Supplementary Figure 1** Optical photo of coaxial drop mode ultra depth of field after three-layer region polishing, it could be clearly seen that the structure of the three-layer was different.

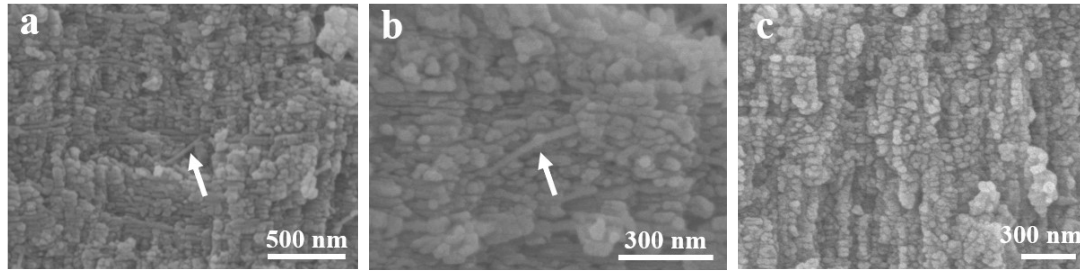

**Supplementary Figure 2** (a-c) Enlarged SEM images of nanoparticles and organic networks and the white arrows represented the organic networks.

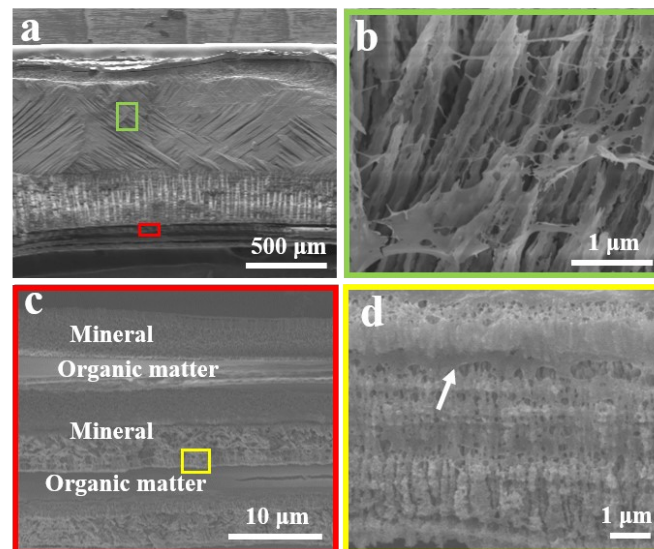

**Supplementary Figure 3** SEM images of the three-layer region of shells after demineralization. (a) Overall view of the three-layer region after demineralization. (b) SEM image of the crossed-lamellar structure after demineralization. (c) SEM image of the nanoparticle layer structure after demineralization, white arrows refer to organic matter. (d) Organic matter between nanoparticles.

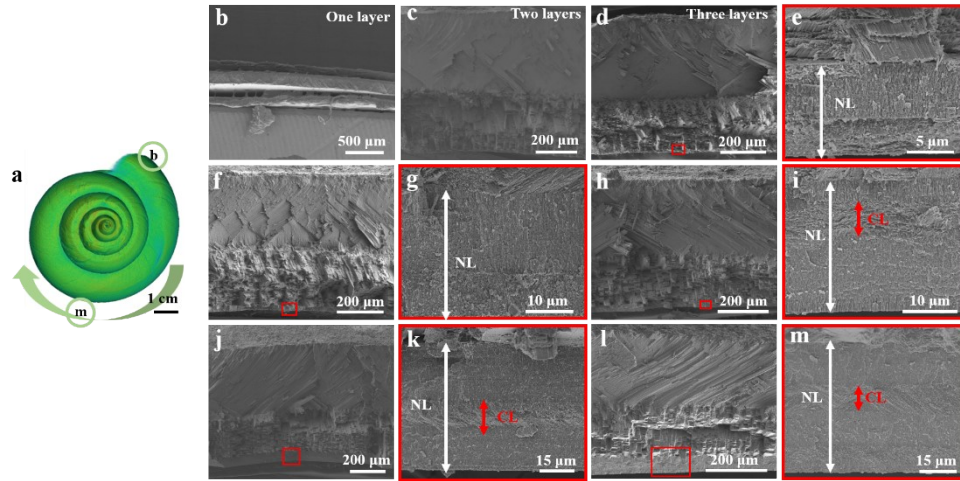

**Supplementary Figure 4** Microstructure of different parts of conch shell in transverse direction. (a) Top view of conch shell. (b) SEM image of outer lip. (c)-(m) SEM images of different parts of conch shell following the direction of the arrows in (a). (e), (g), (i), (k), (m) Enlarged SEM of (d), (f), (h), (j), (l) respectively.

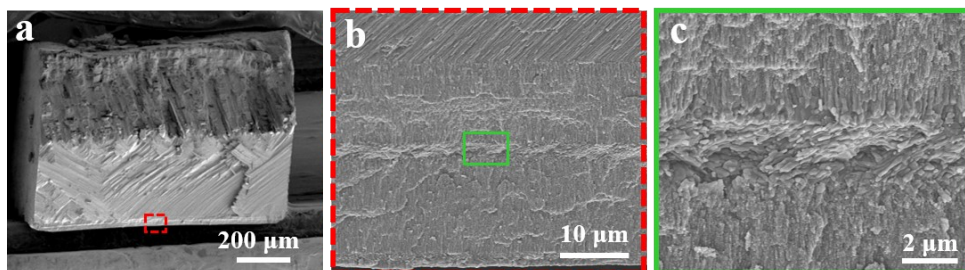

**Supplementary Figure 5** SEM images of higher resolution micro-CT (700 nm/voxel). (a) Sectional view of the CT sample. (b) Enlarged SEM image of (a). (c) Enlarged SEM image of (b), showing different forms of minerals.

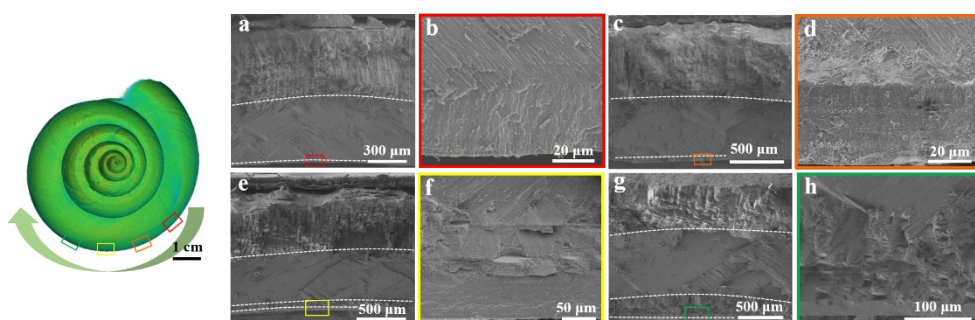

**Supplementary Figure 6** (a)-(h) Microstructure of different parts of conch shell, which showed the four-layer structure, with three crossed-lamellar structure and one nanoparticle layer. (b), (d), (f), (h) Enlarged SEM of (a), (c), (e), (g) respectively.

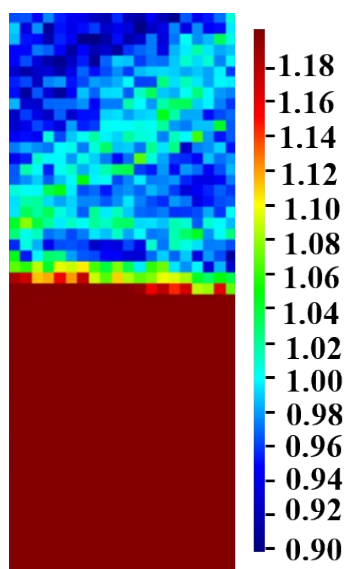

**Supplementary Figure 7** Raman maps acquired from the region indicated in e showing the changes of the ratio between the intensity of peak at  $150\text{ cm}^{-1}$  and  $204\text{ cm}^{-1}$ , showing the mineral orientation of the cross-lamellar structure.

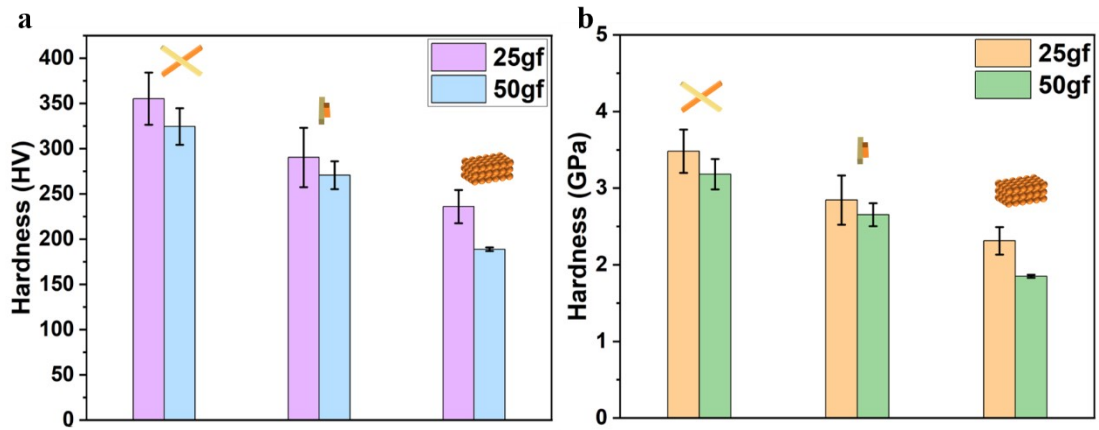

**Supplementary Figure 8** (a) and (b) Vickers hardness values for different microstructures. The unit of (a) was HV, the unit of (b) was GPa.

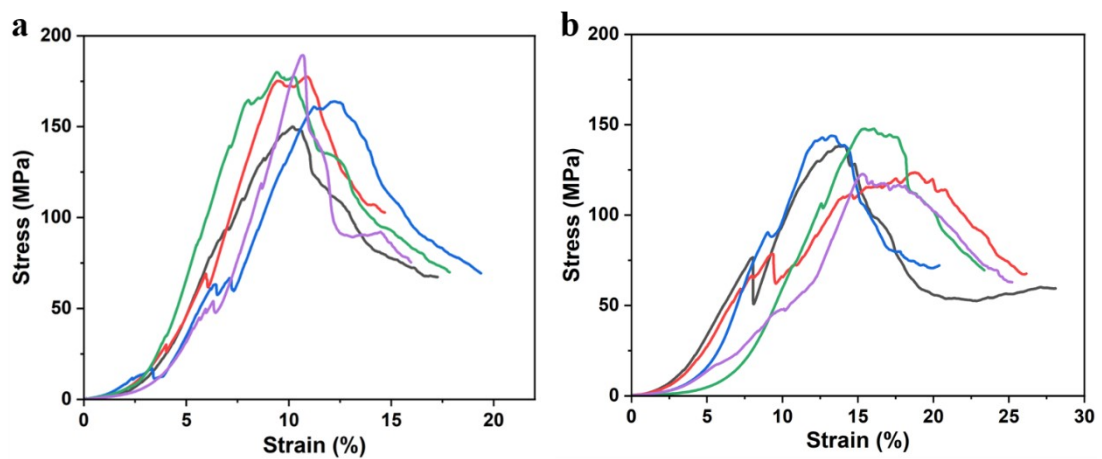

**Supplementary Figure 9** (a) Compression stress-strain curves in the three-layer region. (b) Compression stress-strain curves in the two-layer region. The compressive strength of the three-layer region was higher than that of the two-layer region.

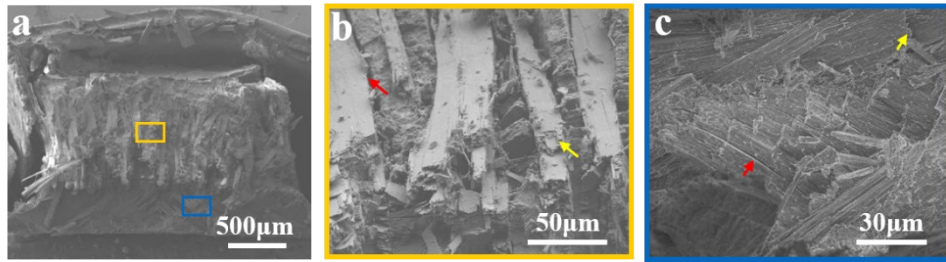

**Supplementary Figure 10** (a) SEM image of the compressed sample with failure in the two-layer region of the conch shell. (b) Magnification of the yellow box in (a), it shows the crack propagation when the crossed-lamellar structure was compressed. (c) Magnification of the blue box in (a), red arrows represent first-order lamellae interface failure and yellow arrows represent second-order lamellae interface failure.

**Supplementary Movie 1** Micro-CT data and visualization of the whole conch shell. Voxel size = 8  $\mu\text{m}$ .

**Supplementary Movie 2** High resolution Micro-CT data and visualization of the dorsal region of conch shell. Voxel size = 700 nm.
